# 1 The Parasite Extinction Assessment 2 & Red List: an open-source, online 3 biodiversity database for neglected 4 symbionts

5 **Colin J. Carlson\*<sup>1†</sup>, Oliver C. Muellerklein<sup>1†</sup>, Anna J. Phillips<sup>2</sup>, Kevin R. Burgio<sup>3</sup>,  
6 Giovanni Castaldo<sup>1</sup>, Carrie A. Cizauskas<sup>1</sup>, Graeme S. Cumming<sup>4</sup>, Tad A. Dallas<sup>5</sup>,  
7 Jorge Doña<sup>6</sup>, Nyeema Harris<sup>7</sup>, Roger Jovani<sup>6</sup>, Zhongqi Miao<sup>1</sup>, Heather Proctor<sup>8</sup>,  
8 Hyun Seok Yoon<sup>1</sup>, Wayne M. Getz<sup>1,9</sup>**

**\*For correspondence:**

[cjcarlson@berkeley.edu](mailto:cjcarlson@berkeley.edu) (CJC);  
[omuellerklein@berkeley.edu](mailto:omuellerklein@berkeley.edu) (OCM)

†These authors contributed equally  
to this work.

9 <sup>1</sup>Department of Environmental Science, Policy, and Management, University of California  
10 Berkeley; Berkeley, CA, United States; <sup>2</sup>Department of Invertebrate Zoology, National  
11 Museum of Natural History, Smithsonian Institution; Washington, DC, United States;  
12 <sup>3</sup>Department of Ecology and Evolutionary Biology, University of Connecticut; Storrs, CT,  
13 United States; <sup>4</sup>ARC Centre of Excellence in Coral Reef Studies, James Cook University;  
14 Townsville, Queensland, Australia; <sup>5</sup>Department of Environmental Science and Policy,  
15 University of California; Davis, CA, United States; <sup>6</sup>Department of Evolutionary Ecology,  
16 Estación Biológica de Doñana (CSIC); Americo Vespucio s/n, E-41092 Sevilla, Spain;  
17 <sup>7</sup>Ecology and Evolutionary Biology, University of Michigan; Ann Arbor, MI, United States;  
18 <sup>8</sup>Department of Biological Sciences, University of Alberta; Edmonton, Alberta, Canada;  
19 <sup>9</sup>School of Mathematical Sciences, University of KwaZulu-Natal; South Africa.

---

21 **Abstract** Parasite conservation is a rapidly growing field at the intersection of ecology,  
22 epidemiology, parasitology, and public health. The overwhelming diversity of parasitic life on earth,  
23 and recent work showing that parasites and other symbionts face severe extinction risk,  
24 necessitates infrastructure for parasite conservation assessments. Here, we describe the release of  
25 the Parasite Extinction Assessment & Red List (PEARL) version 1.0, an open-access database of  
26 conservation assessments and distributional data for almost 500 macroparasitic invertebrates. The  
27 current approach to vulnerability assessment is based on range shifts and loss from climate  
28 change, and will be expanded as additional data (e.g., host-parasite associations and coextinction  
29 risk) is consolidated in PEARL. The web architecture is also open-source, scalable, and extensible,  
30 making PEARL a template for more efficient red listing for other high-diversity, data-deficient  
31 groups. Future iterations will also include new functionality, including a user-friendly open data  
32 repository and automated assessment and re-listing.

---

## 34 Introduction

35 Parasitism is one of the most common forms of life on Earth, if not, by species totals, the most  
36 common (**Larsen et al., 2017; Dobson et al., 2008**). Even excluding microparasites—such as some  
37 bacteria, viruses, and protozoans—the remaining diversity of macroparasites (e.g., helminths,  
38 leeches, lice, ticks, fleas, and mites) is staggering and comparatively understudied in ecology. Basic  
39 questions remain open at the intersection of parasitology with other fields like community ecology  
40 (**Johnson et al., 2015**), evolutionary ecology (**Morand, 2015**), macroecology (**Stephens et al., 2016**),  
41 and climate change biology (**Brooks and Hoberg, 2007; Altizer et al., 2013; Cizauskas et al., 2017**).  
42 As the field of disease ecology has matured, a growing body of work has shown that parasites are a  
43 critical part of ecosystems, acting as regulators of food webs and host populations, and serving  
44 an important role in energy flow through trophic levels (**Dunne et al., 2013**). The increasingly-  
45 apparent benefits of parasites make a case for their recognition as an important neglected target  
46 for conservation (**Whiteman and Parker, 2005; Pizzi, 2009; Carlson et al., 2013; Gómez and Nichols,**  
47 **2013; Dougherty et al., 2016; Rocha et al., 2016**), especially given that parasitic life cycles are already  
48 known to be particularly extinction-prone due to cascading co-extinctions with hosts (**Durden and**  
49 **Keirans, 1996; Dunn et al., 2009; Dallas and Cornelius, 2015; Farrell et al., 2015**). With recent work  
50 showing that climate change and coextinction combined could threaten one in every three helminth  
51 parasite species (**Carlson et al., 2017**), frameworks to assess and catalog parasite extinction risk are  
52 urgently needed.

53 While institutions such as the IUCN have spent decades developing centralized frameworks  
54 for prioritizing the conservation of free-living biodiversity, parasites are rarely included in main-  
55 stream assessments; for example, only two animal macroparasites are listed on the IUCN Red  
56 List (*Hematopinus oliveri*, the pygmy hog louse, and *Hirudo medicinalis*, the medicinal leech). The  
57 under-representation of parasites speaks to broader deficiencies in IUCN invertebrate assess-  
58 ments, but also to the comparative bias against parasites in conservation, which has conventionally  
59 treated parasites and disease as synonymous (**Dougherty et al., 2016**). Mainstreaming parasites  
60 into conservation requires researchers to address a number of additional factors: the independent  
61 extinction risk of parasites as well as coextinction risk, the degree of host specificity, the modes and  
62 efficiency of transmission, the possibility for unintended consequences to wildlife or human health,  
63 the cost-effectiveness of parasite conservation as a compatible goal with host conservation, and  
64 the feasibility of *ex situ* conservation (**Dougherty et al., 2016**).

65 At the most basic level, incorporating parasite conservation measures into existing free-living  
66 species' conservation plans can prevent accidental or deliberate loss of affiliates (**Jørgensen, 2015**),  
67 e.g. the extinction of the California condor's louse *Colpocephalum californianus*, or the black-footed  
68 ferret louse *Neotrichodectes sp.* (**Stringer and Linklater, 2014**). Some key assessments have been  
69 made for parasites of high-profile hosts like the black-footed ferret (**Gompper and Williams, 1998**)  
70 or the Tasmanian devil (**Wait et al., 2017**), but more expansive assessments are rare. Recent work  
71 has pushed to embrace a broader perspective on symbiosis within parasitology (**Jovani et al.,**  
72 **2017**), and in the context of global change biology, we believe this is an important step towards  
73 effective conservation. Symbionts as a broad group face a common set of challenges, and the  
74 same conservation measures that make sense for parasites are part of a broader shift towards  
75 symbiont-conscious conservation.

76 Rising interest in parasite conservation comes at a time when open data in parasitology is rapidly  
77 expanding; while host-parasite association data have historically been available from scientific  
78 collections or online databases (**Strona and Lafferty, 2012; Dallas, 2016**), only in the last few years  
79 have major sources such as the U.S. National Parasite Collection (**Lichtenfels et al., 1992; Carlson**  
80 **et al., 2017**) or Global Mammal Parasite Database (**Stephens et al., 2017**) been updated to include  
81 the detailed spatial data that are critical for conservation assessments. Expanding existing reposi-  
82 tories, and improving access to collections data, is already a key part of ongoing work bridging the  
83 gap between parasitology and other fields like epidemiology, disease ecology, and conservation

84 (*DiEuliis et al., 2016*). For parasite conservation to be operational and actionable in the shortest  
85 term, researchers currently need a detailed and dedicated bioinformatic repository for the explicit  
86 purpose of centralizing data on population trends, extinction risk, distributions, and conservation  
87 efforts. Here, we present the Parasite Extinction Assessment & Red List (PEARL: [pearl.berkeley.edu](http://pearl.berkeley.edu)),  
88 the first standalone global parasite conservation assessment, database, and web interface.

### 89 **PEARL version 1.0**

90 The Parasite Extinction Assessment & Red List compiles the preliminary work of the Parasite  
91 Extinction Research Project (2013-2016). The core study (*Carlson et al., 2017*) accomplished three  
92 tasks:

- 93 1. The georeferencing of the U.S. National Parasite Collection (USNPC), and the compilation of  
94 the most detailed occurrence dataset for macroparasites currently available.
- 95 2. The estimation of global parasite extinction risk: an estimated 5-10% of species face direct  
96 extinction risk from climate change, while up to 30% of helminths face a combined threat  
97 from coextinction and climate change.
- 98 3. The preliminary release of PEARL version 0.1, a prototype with a static interface, PDF maps,  
99 and no search functionality.

100 Building on PEARL v0.1, the full PEARL v1.0 was released on August 11, 2017 and features an open-  
101 source web architecture, which allows a more flexible interface and tool to access the underlying  
102 open-access database. Here we formalize the documentation for PEARL v1.0, explaining the  
103 updated mechanics of PEARL as a new, standalone form of red listing for parasites and other  
104 symbionts; and to outline the use of the framework in the inclusion of parasites in conservation  
105 research, and more generally for invertebrate conservation.

### 106 **The Assessment**

107 As a scientific resource, PEARL serves two main purposes: an *extinction assessment*, which compiles  
108 the extinction risk of enough species that global parasite extinction rates from climate change can  
109 be measured; and a *red list*, analogous to the IUCN Red List but focused specifically on measuring  
110 the vulnerability of macroparasitic species. The species currently included in the assessment fall  
111 into eight major groups: helminth endoparasites (acanthocephalans, cestodes, nematodes, and  
112 trematodes) and arthropod ectoparasites (fleas, lice, mites, and ticks). The term parasites is used  
113 broadly both here and in the underlying premise of PEARL. While the focus of the assessment is  
114 parasitic species, in the overarching goal of mainstreaming parasites into conservation (*Dougherty  
115 et al., 2016*), several species and groups are included that are not strictly parasitic. For example,  
116 vane-dwelling feather mites (Acariformes: Analgoidea, Pterolichoidea), like many other symbionts,  
117 may contextually change roles between parasitism and commensalism or mutualism (*Galván et al.,  
118 2012*); within other significant groups in our study, parasitism has secondarily evolved multiple  
119 times (*Dorris et al., 1999; Bochkov and Mironov, 2013*).

120 The vulnerability of species is measured based on projected range loss in the face of climate  
121 change, which was forecasted through the use of ecological niche modeling (*Carlson et al., 2017*).  
122 Eighteen climate change scenarios are included in that assessment for 457 non-marine macropara-  
123 sitic species, and extinction risk is estimated based on those projected rates of habitat loss. These  
124 are translated into “red listing categories” based on estimated percent range loss in the next 50  
125 years (i.e., by 2070):

- 126 • **Critically endangered (CR):** projected decline by  $\geq 80\%$  in 50 years
- 127 • **Endangered (EN):** projected 50–79% decline in 50 years
- 128 • **Vulnerable (VU):** projected 25-49% decline in 50 years
- 129 • **Least Concern (LC):** < 25% decline in 50 years

130 The assessment is designed to be fully transparent about accuracy and bias; accuracy metrics for  
131 niche modeling (the true skill statistic and the area under the receiver-operator curve), as well as  
132 categorical measures of data quality, are presented alongside distribution models. We developed  
133 two data quality metrics based on percentiles within our dataset. Data *coverage* is based on sample  
134 size:

| Coverage    | Percentile | Occurrence Points |
|-------------|------------|-------------------|
| "Poor"      | 0-25       | 0-28              |
| "Fair"      | 25-50      | 29-42             |
| "Good"      | 50-75      | 43-80             |
| "Excellent" | 75-100     | 81-3289           |

136 Data *uncertainty* is based on the mean uncertainty radius of every point from manual georefer-  
137 encing; some species only had GPS-identified data, which were classified as zero uncertainty from  
138 georeferencing:

| Uncertainty | Percent | Distance (km) |
|-------------|---------|---------------|
| "Perfect"   | -       | 0             |
| "Excellent" | 0-25    | 0-5.1         |
| "Good"      | 25-50   | 5.1-6.5       |
| "Fair"      | 50-75   | 6.5-7.9       |
| "Weak"      | 75-100  | 7.9-21.3      |

140 By presenting quality as a mainstreamed part of the assessment, we improve transparency, better  
141 inform practitioners relying on these data for any applied research, and clearly identify species for  
142 which improved data collection is needed (i.e., more precise locality data).

### 143 The Web Interface

144 PEARL is an open-source web app that builds on several frontend and backend APIs and novel  
145 software libraries in both the *Python* and *JavaScript* programming languages. In the backend, PEARL  
146 builds upon a **Python 3.5** based web framework developed by Z. Miao and O. Muellerklein called  
147 Extensible Web App Interactive Mapping, **EWAIM on Github**<sup>1</sup>. EWAIM incorporates continuous  
148 unit testing, a basic yet extensible library for server-side (*i.e. backend*) data analysis, and native  
149 integration with spatial data structures through **PostGIS / PostgreSQL** or **SQLite**. PEARL's use of  
150 the underlying EWAIM server-side web framework allows near endless GIS functionality to be used  
151 on spatial or time series data.

152 In the frontend, PEARL uses standard *GET / POST* events to process user events to and from the  
153 server-side application, allowing interactivity with the backend database via species maps and other  
154 functionality in the various web pages / interfaces. Building upon EWAIM, PEARL handles user events  
155 to and from web pages through *Flask* protocol, a Python based extensible web microframework.  
156 Within the frontend components of PEARL a range of mapping APIs are called. Frontend libraries  
157 and API used in PEARL include:

- 158 • **D3.js - Data Driven Documents**<sup>2</sup>: an open-source JavaScript library for dynamic, interactive  
159 data visualizations
- 160 • **Leaflet API**<sup>3</sup>: an open-source JavaScript library that allows interactive mapping of PEARL  
161 tilemaps and provides a mobile-friendly design

<sup>1</sup>EWAIM on Github: <https://github.com/Thru-Echoes/ewaim-webapp>

<sup>2</sup>D3.js homepage: <https://d3js.org/>

<sup>3</sup>Leaflet API homepage: <http://leafletjs.com/>

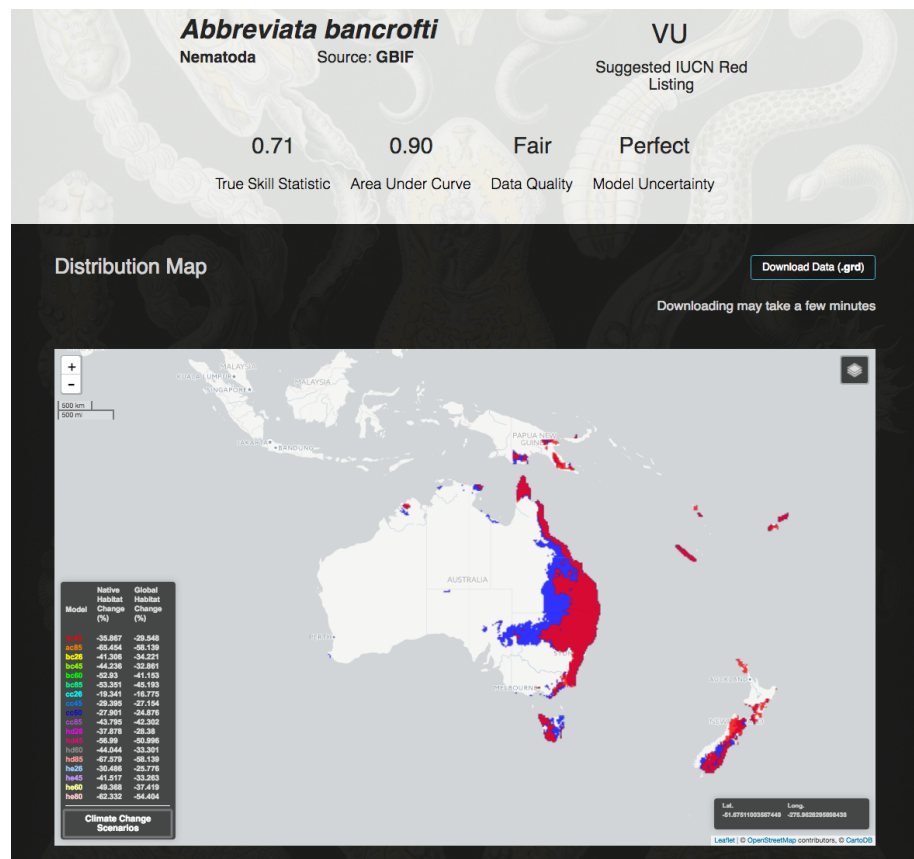

**Figure 1.** The online interface to PEARL v1.0, illustrated for *Abbreviata bancrofti* (Phylopteroidea; Irwin-Smith, 1922), a nematode parasite of the Australian leaf-tailed gecko, *Phyllurus platurus* (Reptilia: Gekkonidae). Results include the current distribution of the nematode (blue) and 18 future climate scenarios. Above, information about the entry is available, including data sources, and model accuracy metrics.

- **CARTO Maps API**<sup>4</sup> an open-source engine that is scalable and extensible, powers a range of basemaps, and interacts with Leaflet, Google Earth Engine, and CARTO SQL data structures

PEARL, as a web app and open-source software, is fully documented and available publicly as a Github repository<sup>5</sup> with version releases and community-based issues tracked accordingly. The underlying raster files can be downloaded in grid file (.grd) format directly from species pages, and R- and Python-based APIs are currently in development that will allow users to pull data from multiple species at once. Future iterations of PEARL development include, but are not limited to, a more robust mobile-friendly structure; public data uploads and downloads through user login and associated profiles; and the incorporation of a novel dynamic, real-time algorithm that would automate generating and rendering distribution models and associated data analysis based on user data contributions (see Dynamic Updating section below).

### Extending the Framework

The purpose of PEARL is to create a stable platform for parasite conservation that allows continuous improvements by existing teams, and that can incorporate future collaborations from other researchers both in PEARL development and database-building. The full expanded platform makes the interface, and underlying database, extensible in a number of important ways that will be useful both for the future of PEARL, and as a template for the broader problem of invertebrate

<sup>4</sup>CARTO homepage: <https://carto.com/>

<sup>5</sup>PEARL Github repository: <https://github.com/Thru-Echoes/PEARL1.0>

179 conservation assessments. After the release of version 1.0, a number of scheduled advances are  
180 planned for PEARL over the coming years. We detail five here:

## 181 Assessment II

182 A major goal for PEARL is the expansion of assessments beyond the 457 species in the pilot study  
183 by *Carlson et al. (2017)*, to include some of the other increasingly-available open data sources  
184 in parasitology. The goal of fully georeferencing the U.S. National Parasite Collection—including  
185 species with insufficient unique locality points for the main extinction study—by 2018 gives a clear  
186 rationale for an expanded assessment, especially in conjunction with the recent release of the  
187 Global Mammal Parasite Database v2.0 with spatial data (*Stephens et al., 2017*). Also critical is  
188 including smaller, regional datasets from biodiversity hotspots like the Amazon, or the Cape Floristic  
189 Region of South Africa. Given that distribution modeling requires a minimum of at least 20-50  
190 occurrences, it would be useful to include species that are currently impossible to map in future  
191 iterations by presenting raw occurrence data, rather than niche models. Providing these data may  
192 help guide targeted field collection programs that address these data deficiencies.

## 193 Reconsidered Criteria

194 Red listing parasites—or, in fact, any dependent species—poses a more severe methodological  
195 problem than already-challenging work on free-living species. In particular, well-designed criteria  
196 must accommodate the tremendous diversity of symbiotic groups, and rescale important metrics  
197 of viability to an appropriate level; but effective criteria must also (presumably) include information  
198 about the vulnerability of hosts. The criteria underlying assessment version 1.0 only indirectly  
199 addressed the first of these two challenges, by presenting a radically simplified version of the  
200 *Thomas et al. (2004)* criteria, which were already reduced from the IUCN Red List criteria.

201 For comparison, the criteria used in *Thomas et al. (2004)* are designed to correspond directly to  
202 projected extinction risk:

- 203 • **Extinct (EX):** species with a projected future area of zero (100% of species assumed to be  
204 committed to eventual extinction)
- 205 • **Critically endangered (CR):** projected future distribution area < 10 km<sup>2</sup>, or decline by ≥ 80%  
206 in 50 years (species assigned a 75% chance of extinction)
- 207 • **Endangered (EN):** projected area 10–500 km<sup>2</sup>, or 50–79% decline in 50 years (species assigned  
208 a 35% chance of extinction)
- 209 • **Vulnerable (VU):** projected area 501–2,000 km<sup>2</sup>, or > 50% decline in 100 years on the basis of  
210 linear extrapolation of 50-year projection (species assigned a 15% chance of extinction)
- 211 • **Not Threatened (NT):** 0% extinction risk, no area loss

212 In the *Carlson et al. (2017)* study and PEARL v0.1 (and v1.0), these criteria are reduced to percentage-  
213 based criteria only:

- 214 • **Critically endangered (CR):** projected decline by ≥ 80% in 50 years
- 215 • **Endangered (EN):** projected 50–79% decline in 50 years
- 216 • **Vulnerable (VU):** projected 25-49% decline in 50 years
- 217 • **Least Concern (LC):** < 25% decline in 50 years

218 The inadequacy of these criteria is a key point articulated by *Carlson et al. (2017)*, and we return to  
219 it here to note that it offers only the coarsest level of possible resolution for categorizing extinction  
220 risk. More detailed criteria are needed that incorporate risk factors like small ranges (with minimal  
221 projected declines), but parasite conservation has yet to develop meaningful benchmarks for these  
222 criteria; what is a “small range” for a parasitic species? Is a small range for a trophically-transmitted  
223 nematode the same size as a small range for a tick with a single common host? The role of  
224 microclimate and heterogeneity within ranges, or of habitat selection and dispersal patterns of  
225 hosts, further complicates this problem. Similarly, *Dougherty et al. (2016)* highlighted the need for

226 advances in population viability analysis for parasites, such that concepts like “minimum viable  
227 population” can be readily applied, and included in these criteria.

#### 228 Better Host & Parasite Bioinformatics

229 Host and symbiont extinction risk are fundamentally linked, and conservation of parasites and  
230 other symbionts cannot exist in the absence of detailed host information. For ticks and feather  
231 mites, underlying data from the *Carlson et al. (2017)* study contains host association data that can  
232 be mainstreamed into future versions. Moreover, access to portals like the helminthR package in R  
233 (*Dallas, 2016*) will make it possible to compile detailed information on host-parasite associations for  
234 helminths, but these data lack information about the life stage at which different hosts are relevant.  
235 Adding life stage-structured data to host-parasite associations will be a key part of PEARL expansion,  
236 especially given that host-range disjunctions might be a substantial pressure on parasites in a  
237 changing climate (*Pickles et al., 2013; Cizauskas et al., 2017*). A new database published this year  
238 makes significant strides towards aggregating life cycle data for acanthocephalans, nematodes,  
239 and cestodes (*Benesh et al., 2017*); compiling that data for every species in our study will still likely  
240 require the concerted effort of researchers contributing to the expansion of the PEARL database.

241 The integration of host-parasite association data is an especially sensitive matter in the design of  
242 actual parasite conservation schemes. The potential for conflict between parasite conservation and  
243 the broader goals of wildlife and human health has already been noted by *Dougherty et al. (2016)*,  
244 and a fundamental tenet of effective parasite conservation is attention to potential unanticipated  
245 consequences for conservation or public health. Parasites with zoonotic potential or that act  
246 as vectors of zoonoses are an especially difficult case, as they may be the target of eradication  
247 campaigns simultaneous to conservation efforts for closely related parasites. Developing an  
248 aggregated bioinformatic infrastructure that serves both purposes will support parasite research in  
249 diverse realms, and facilitate the work of public health practitioners and conservation managers  
250 alike. Consequently, future assessments should not only include wildlife (and domestic) host  
251 associations, but also detailed information on the known zoonotic potential of every species.

#### 252 Integrating Genomic Data

253 The increasing availability of genomic data associated with the continuous improvements in se-  
254 quencing and bioinformatics (*Stephens et al., 2015*), and with global initiatives such as the Earth  
255 BioGenome project (EBP; *Pennisi (2017)*), is becoming a huge source of data for conservation  
256 assessments (*Pauls et al., 2013; Ikeda et al., 2017; Razgour et al., 2017*). Genomic data can be  
257 programmatically gathered from massive databases, such as the NCBI Genome database<sup>6</sup> and the  
258 European Nucleotide Archive (ENA<sup>7</sup>). Notwithstanding, given the bias against symbiont genomes  
259 (*Del Campo et al., 2014*), PEARL may need dedicated projects to generate genomic data for the  
260 species already included. Doing so open the doors to a number of important new analyses, such  
261 as genetically informed ecological niche models (ENMs; *Marcer et al. (2016); Ikeda et al. (2017)*)  
262 following integrative frameworks (*Razgour et al., 2017*). In this way, assessments can include mea-  
263 sures based on neutral and adaptive genomic information to assess the sensitivity of species to  
264 environmental variables associated with global change. For these computationally challenging  
265 purposes, PEARL will likely require of an increase in computational resources (*Hayden, 2015*).

#### 266 Dynamic Updating

267 One strength of PEARL's dynamic interface is the potential for continuously-updating red listing,  
268 which updates existing species assessments and adds new ones in real-time as new data are  
269 contributed by researchers around the world. In an upcoming release, we hope to include an  
270 automated tool for continuous integration of new data and assessments, in which submitted spatial  
271 data automatically augments the existing global database. This workflow will pave the way for future

<sup>6</sup><http://www.ncbi.nlm.nih.gov/genome/>

<sup>7</sup><http://www.ebi.ac.uk/ena>

272 conservation approaches by allowing dynamically updated red listing, via continuous integration of  
273 data into self-updating niche models and respective quality metrics. PEARL can serve as a launching  
274 point for an alternative red listing protocol that incorporates machine learning methods to evaluate  
275 conservation status at the community or global level (e.g. see recent work by *Darrah et al. (2017)*),  
276 rather than on a manual species-to-species basis (like most current efforts operate), something  
277 that will likely be helpful in red listing the 300,000 estimated species of helminths alone.

### 278 **Application to Other Conservation Efforts**

279 PEARL is designed to be a template for more successful rapid assessment of conservation risk and  
280 status for invertebrates and other difficult-to-profile groups, especially other types of symbionts  
281 and coextinction-prone affiliate species. All code for PEARL is publicly available, allowing the rapid  
282 and easy development of parallel tools for non-parasitic groups, and encouraging a broader culture  
283 of open, reproducible science in conservation. The Github repository contains a detailed user-guide  
284 to installing local and server-side instances of PEARL and its underlying web architecture across a  
285 number of operating systems, making it easily adaptable for a diverse range of ecological projects.  
286 Developing better, broader frameworks for invertebrate conservation could be substantially accel-  
287 erated with readily available, open-source frameworks for red listing that allow more decentralized  
288 data collection and assessment. Data deficiencies for invertebrates are overwhelming (*Clausnitzer  
289 et al., 2009; Régnier et al., 2015*), and despite the priority put on red listing insects, there is concern  
290 that hyper-diverse groups like the insects will never be described thoroughly enough that conser-  
291 vation assessments can keep pace with extinction rates (*Warren et al., 2007*). Decentralizing the  
292 red listing process, and enabling smaller assessments as data are collected, is an important step to  
293 protecting not just parasites, but all symbionts and other neglected or understudied groups.

### 294 **Acknowledgments**

295 We would like to thank the generous contributions of time and effort to the Parasite Extinction  
296 Research Project by our broader team, including Christopher Clements, Eric Dougherty, Sarah  
297 Fourby, Nicole Kula, and Sergey Mironov. We especially also thank Gary Casterline for invaluable  
298 server and file system assistance for PEARL.

### 299 **References**

- 300 **Altizer S**, Ostfeld RS, Johnson PT, Kutz S, Harvell CD. Climate change and infectious diseases: from evidence to a  
301 predictive framework. *Science*. 2013; 341(6145):514–519.
- 302 **Benesh DP**, Lafferty KD, Kuris A. A life cycle database for parasitic acanthocephalans, cestodes, and nematodes.  
303 *Ecology*. 2017; 98(3):882–882.
- 304 **Bochkov A**, Mironov S. Is parasitism of metazoa “a one-way ticket”? *Entomological review*. 2013; 93(9):1196–  
305 1206.
- 306 **Bostock M**, Ogievetsky V, Heer J. D3 Data-Driven Documents. *IEEE Transactions on Visualization and Computer  
307 Graphics*. 2011 Dec; 17(12):2301–2309. <https://d3js.org/>, doi: 10.1109/TVCG.2011.185.
- 308 **Brooks DR**, Hoberg EP. How will global climate change affect parasite–host assemblages? *Trends in parasitology*.  
309 2007; 23(12):571–574.
- 310 **Carlson CJ**, Burgio KR, Dougherty ER, Phillips AJ, Bueno VM, Clements CF, Castaldo G, Dallas TA, Cizauskas  
311 CA, Cumming GS, Doña J, Harris NC, Jovani R, Mironov S, Muellerklein OC, Proctor HC, Getz WM. Parasite  
312 biodiversity faces extinction and redistribution in a changing climate. *Science Advances*. 2017; 3:e1602422.
- 313 **Carlson CJ**, Cizauskas CA, Burgio KR, Clements CF, Harris NC. The more parasites, the better? *Science*. 2013;  
314 342(6162):1041–1041.
- 315 **Cizauskas CA**, Carlson CJ, Burgio KR, Clements CF, Dougherty ER, Harris NC, Phillips AJ. Parasite vulnerability to  
316 climate change: an evidence-based functional trait approach. *Royal Society Open Science*. 2017; 4(1):160535.



- 317 **Clausnitzer V**, Kalkman VJ, Ram M, Collen B, Baillie JE, Bedjanič M, Darwall WR, Dijkstra KDB, Dow R, Hawking J,  
318 et al. Odonata enter the biodiversity crisis debate: the first global assessment of an insect group. *Biological*  
319 *Conservation*. 2009; 142(8):1864–1869.
- 320 **Colwell RK**, Dunn RR, Harris NC. Coextinction and persistence of dependent species in a changing world. *Annual*  
321 *Review of Ecology, Evolution, and Systematics*. 2012; 43:183–203.
- 322 **Dallas T**. *helminthR*: an R interface to the London Natural History Museum's host–parasite database. *Ecography*.  
323 2016; 39(4):391–393.
- 324 **Dallas T**, Cornelius E. Co-extinction in a host-parasite network: identifying key hosts for network stability.  
325 *Scientific reports*. 2015; 5:13185.
- 326 **Darrah SE**, Bland LM, Bachman SP, Clubbe CP, Trias-Blasi A. Using coarse-scale species distribution data to  
327 predict extinction risk in plants. *Diversity and Distributions*. 2017; 23(4):435–447.
- 328 **Del Campo J**, Sieracki ME, Molestina R, Keeling P, Massana R, Ruiz-Trillo I. The others: Our biased perspective of  
329 eukaryotic genomes. *Trends in Ecology and Evolution*. 2014; 29(5):252–259. doi: [10.1016/j.tree.2014.03.006](https://doi.org/10.1016/j.tree.2014.03.006).
- 330 **DiEuliis D**, Johnson KR, Morse SS, Schindel DE. Opinion: Specimen collections should have a much bigger role in  
331 infectious disease research and response. *Proceedings of the National Academy of Sciences*. 2016; 113(1):4–7.
- 332 **Dobson A**, Lafferty KD, Kuris AM, Hechinger RF, Jetz W. Homage to Linnaeus: How many parasites? How many  
333 hosts? *Proceedings of the National Academy of Sciences*. 2008; 105(Supplement 1):11482–11489.
- 334 **Dorris M**, De Ley P, Blaxter M. Molecular analysis of nematode diversity and the evolution of parasitism.  
335 *Parasitology today*. 1999; 15(5):188–193.
- 336 **Dougherty E**, Carlson C, Bueno V, Burgio K, Cizauskas C, Clements C, Seidel D, Harris N. Paradigms for parasite  
337 conservation. *Conservation Biology*. 2016; 30(4):724.
- 338 **Dunn RR**, Harris NC, Colwell RK, Koh LP, Sodhi NS. The sixth mass coextinction: are most endangered  
339 species parasites and mutualists? *Proceedings of the Royal Society of London B: Biological Sciences*. 2009;  
340 276(1670):3037–3045.
- 341 **Dunne JA**, Lafferty KD, Dobson AP, Hechinger RF, Kuris AM, Martinez ND, McLaughlin JP, Mouritsen KN, Poulin R,  
342 Reise K, et al. Parasites affect food web structure primarily through increased diversity and complexity. *PLoS*  
343 *biology*. 2013; 11(6):e1001579.
- 344 **Durden LA**, Keirans JE. Host–parasite coextinction and the plight of tick conservation. *American Entomologist*.  
345 1996; 42(2):87–91.
- 346 **Farrell MJ**, Stephens PR, Berrang-Ford L, Gittleman JL, Davies TJ. The path to host extinction can lead to loss of  
347 generalist parasites. *Journal of Animal Ecology*. 2015; 84(4):978–984.
- 348 **Galván I**, Aguilera E, Atiénzar F, Barba E, Blanco G, Cantó JL, Cortés V, Frías Ó, Kovács I, Meléndez L, et al. Feather  
349 mites (Acari: Astigmata) and body condition of their avian hosts: a large correlative study. *Journal of Avian*  
350 *Biology*. 2012; 43(3):273–279.
- 351 **Gómez A**, Nichols E. Neglected wild life: parasitic biodiversity as a conservation target. *International Journal for*  
352 *Parasitology: Parasites and Wildlife*. 2013; 2:222–227.
- 353 **Gompper ME**, Williams ES. Parasite conservation and the black-footed ferret recovery program. *JSTOR*; 1998.
- 354 **Hayden EC**. Genome researchers raise alarm over big data. *Nature*. 2015; doi: [10.1038/nature.2015.17912](https://doi.org/10.1038/nature.2015.17912).
- 355 **Ikeda DH**, Max TL, Allan GJ, Lau MK, Shuster SM, Whitham TG. Genetically informed ecological niche models  
356 improve climate change predictions. *Global Change Biology*. 2017; 23(1):164–176. doi: [10.1111/gcb.13470](https://doi.org/10.1111/gcb.13470).
- 357 **Johnson PT**, De Roode JC, Fenton A. Why infectious disease research needs community ecology. *Science*. 2015;  
358 349(6252):1259504.
- 359 **Jørgensen D**. Conservation implications of parasite co-reintroduction. *Conservation Biology*. 2015; 29(2):602–  
360 604.
- 361 **Jovani R**, Doña J, del Mar Labrador M, Serrano D. Opening the Doors of Parasitology Journals to Other Symbionts.  
362 *Trends in Parasitology*. 2017; .

- 363 **Larsen BB**, Miller EC, Rhodes MK, Wiens JJ. Inordinate Fondness Multiplied and Redistributed: the Number of  
364 Species on Earth and the New Pie of Life. *The Quarterly Review of Biology*. 2017; 92(3):229–265.
- 365 **Lichtenfels JR**, Pilitt P, Hoberg EP. The US National Parasite Collection: a century of service. *Journal of*  
366 *Parasitology*. 1992; p. 924–929.
- 367 **Marcer A**, Méndez-Vigo B, Alonso-Blanco C, Picó FX. Tackling intraspecific genetic structure in distribution  
368 models better reflects species geographical range. *Ecology and Evolution*. 2016; 6(7):2084–2097. doi:  
369 [10.1002/ece3.2010](https://doi.org/10.1002/ece3.2010).
- 370 **Morand S**. (macro-) Evolutionary ecology of parasite diversity: From determinants of parasite species richness  
371 to host diversification. *International Journal for Parasitology: Parasites and Wildlife*. 2015; 4(1):80–87.
- 372 **Pauls SU**, Nowak C, Bálint M, Pfenninger M. The impact of global climate change on genetic diversity within  
373 populations and species. *Molecular Ecology*. 2013; 22(4):925–946. doi: [10.1111/mec.12152](https://doi.org/10.1111/mec.12152).
- 374 **Pennisi E**. Sequencing all life captivates biologists. *Science*. 2017; 355(6328):894–895. doi: [10.1126/sci-](https://doi.org/10.1126/science.355.6328.894)  
375 [ence.355.6328.894](https://doi.org/10.1126/science.355.6328.894).
- 376 **Pickles RS**, Thornton D, Feldman R, Marques A, Murray DL. Predicting shifts in parasite distribution with climate  
377 change: a multitrophic level approach. *Global change biology*. 2013; 19(9):2645–2654.
- 378 **Pizzi R**. Veterinarians and taxonomic chauvinism: the dilemma of parasite conservation. *Journal of Exotic Pet*  
379 *Medicine*. 2009; 18(4):279–282.
- 380 **Razgour O**, Taggart JB, Manel S, Juste J, Ibáñez C, Rebelo H, Alberdi A, Jones G, Park K. An integrated framework  
381 to identify wildlife populations under threat from climate change. *Molecular Ecology Resources*. 2017; p. 1–14.  
382 doi: [10.1111/1755-0998.12694](https://doi.org/10.1111/1755-0998.12694).
- 383 **Régnier C**, Achaz G, Lambert A, Cowie RH, Bouchet P, Fontaine B. Mass extinction in poorly known taxa.  
384 *Proceedings of the National Academy of Sciences*. 2015; 112(25):7761–7766.
- 385 **Rocha CFD**, Bergallo HG, Bittencourt EB. More than just invisible inhabitants: parasites are important but  
386 neglected components of the biodiversity. *Zoologia (Curitiba)*. 2016; 33(3).
- 387 **Stephens PR**, Altizer S, Smith KF, Alonso Aguirre A, Brown JH, Budischak SA, Byers JE, Dallas TA, Jonathan Davies  
388 T, Drake JM, et al. The macroecology of infectious diseases: a new perspective on global-scale drivers of  
389 pathogen distributions and impacts. *Ecology letters*. 2016; 19(9):1159–1171.
- 390 **Stephens PR**, Pappalardo P, Huang S, Byers JE, Farrell MJ, Gehman A, Ghai RR, Haas SE, Han B, Park AW, et al.  
391 *Global Mammal Parasite Database version 2.0*. *Ecology*. 2017; 98(5):1476–1476.
- 392 **Stephens ZD**, Lee SY, Faghri F, Campbell RH, Zhai C, Efron MJ, Iyer R, Schatz MC, Sinha S, Robinson GE. Big data:  
393 Astronomical or genomics? *PLoS Biology*. 2015; 13(7):1–11. doi: [10.1371/journal.pbio.1002195](https://doi.org/10.1371/journal.pbio.1002195).
- 394 **Stringer AP**, Linklater W. Everything in moderation: principles of parasite control for wildlife conservation.  
395 *BioScience*. 2014; 64(10):932–937.
- 396 **Strona G**, Lafferty KD. FishPEST: an innovative software suite for fish parasitologists. *Trends in parasitology*.  
397 2012; 28(4):123.
- 398 **Thomas CD**, Cameron A, Green RE, Bakkenes M, Beaumont LJ, Collingham YC, Erasmus BF, De Siqueira MF,  
399 Grainger A, Hannah L, et al. Extinction risk from climate change. *Nature*. 2004; 427(6970):145–148.
- 400 **Wait LF**, Peck S, Fox S, Power ML. A review of parasites in the Tasmanian devil (*Sarcophilus harrisii*). *Biodiversity*  
401 *and Conservation*. 2017; p. 1–18.
- 402 **Warren MS**, Bourn N, Brereton T, Fox R, Middlebrook I, Parsons MS. What have red lists done for us? The values  
403 and limitations of protected species listing for invertebrates. *Insect conservation biology*. 2007; p. 76–91.
- 404 **Whiteman NK**, Parker PG. Using parasites to infer host population history: a new rationale for parasite  
405 conservation. In: *Animal Conservation forum*, vol. 8 Cambridge University Press; 2005. p. 175–181.
